# Supplementary material for: Molecular phylogenetics and evolutionary history of the endemic land snail genus Everettia in northern Borneo
Source: PeerJ. 2020 Jul 9;8:e9416. doi: 10.7717/peerj.9416 (PMC7354840; doi:10.7717/peerj.9416)
Supplement: Supplemental Information 1 — The table consists of the 718 records of 17 Everettia species in Sabah obtained from BORNEENSIS collection, Universiti Malaysia Sabah. The collection lot reference number, number of specimens in each collection lot, and the geographic coordinates of the specimens were included in the table. [file peerj-08-9416-s001.xlsx]

## Sheet: Sheet1
BORMOLID	Genus	Species	Lat_short	Long_short	Count
6726	Everettia	jucundior	4.3641	117.908	1
6733	Everettia	jucundior	4.3641	117.908	1
6728	Everettia	jucundior	4.3664	117.903	1
4345	Everettia	occidentalis	4.40293	115.726	1
14041	Everettia	occidentalis	4.40293	115.726	6
1375	Everettia	jucundior	4.46667	117.917	1
1297	Everettia	paulbasintali	4.46667	117.917	5
4268	Everettia	paulbasintali	4.46667	117.917	7
5498	Everettia	paulbasintali	4.46667	117.917	1
14045	Everettia	paulbasintali	4.46667	117.917	3
4274	Everettia	planispira	4.46667	117.917	1
14115	Everettia	planispira	4.46667	117.917	1
6399	Everettia	paulbasintali	4.47347	117.933	1
6398	Everettia	subconsul	4.47347	117.933	2
13011	Everettia	paulbasintali	4.58733	117.3	1
13033	Everettia	paulbasintali	4.58733	117.3	1
13014	Everettia	paulbasintali	4.61711	117.196	1
13027	Everettia	paulbasintali	4.61711	117.196	1
13029	Everettia	paulbasintali	4.61711	117.196	1
13022	Everettia	paulbasintali	4.61741	117.315	5
13030	Everettia	paulbasintali	4.61741	117.315	2
13040	Everettia	paulbasintali	4.62797	117.2	2
13279	Everettia	paulbasintali	4.6312	117.309	6
13032	Everettia	paulbasintali	4.63148	117.272	1
13012	Everettia	paulbasintali	4.63288	117.308	1
13035	Everettia	paulbasintali	4.63288	117.308	1
13036	Everettia	paulbasintali	4.63288	117.308	1
12879	Everettia	interior	4.63813	116.618	1
4332	Everettia	interior	4.64719	116.624	7
12876	Everettia	interior	4.64719	116.624	1
4277	Everettia	interior	4.67332	116.566	2
4305	Everettia	interior	4.67332	116.566	33
12871	Everettia	interior	4.67332	116.566	1
12872	Everettia	interior	4.67332	116.566	1
12873	Everettia	interior	4.67332	116.566	1
12874	Everettia	interior	4.67332	116.566	1
14043	Everettia	interior	4.67332	116.566	25
922	Everettia	jucundior	4.69293	118.013	2
929	Everettia	interior	4.7008	116.401	2
921	Everettia	interior	4.70867	116.603	2
939	Everettia	interior	4.70867	116.603	3
13374	Everettia	subconsul	4.737	116.973	1
13375	Everettia	subconsul	4.737	116.973	1
13372	Everettia	paulbasintali	4.7389	116.97	1
13379	Everettia	subconsul	4.739	116.976	8
969	Everettia	interior	4.80613	116.634	3
2993	Everettia	occidentalis	4.93101	115.719	2
6485	Everettia	occidentalis	4.93577	115.622	2
938	Everettia	subconsul	4.94147	117.809	2
14051	Everettia	jucundior	4.96278	117.802	5
977	Everettia	paulbasintali	4.96278	117.802	1
5271	Everettia	paulbasintali	4.96278	117.802	2
1041	Everettia	planispira	4.96278	117.802	1
1142	Everettia	planispira	4.96278	117.802	1
1148	Everettia	planispira	4.96278	117.802	1
14109	Everettia	planispira	4.96278	117.802	2
931	Everettia	subconsul	4.96278	117.802	1
961	Everettia	subconsul	4.96278	117.802	7
963	Everettia	subconsul	4.96278	117.802	11
965	Everettia	subconsul	4.96278	117.802	5
970	Everettia	subconsul	4.96278	117.802	3
974	Everettia	subconsul	4.96278	117.802	2
936	Everettia	subconsul	4.96278	117.802	1
937	Everettia	subconsul	4.96278	117.802	2
943	Everettia	subconsul	4.96278	117.802	7
947	Everettia	subconsul	4.96278	117.802	2
948	Everettia	subconsul	4.96278	117.802	11
952	Everettia	subconsul	4.96278	117.802	24
953	Everettia	subconsul	4.96278	117.802	13
959	Everettia	subconsul	4.96278	117.802	7
1231	Everettia	subconsul	4.96278	117.802	45
4250	Everettia	subconsul	4.96278	117.802	4
4781	Everettia	subconsul	4.96278	117.802	5
4889	Everettia	subconsul	4.96278	117.802	2
5393	Everettia	subconsul	4.96278	117.802	2
13992	Everettia	paulbasintali	4.96373	117.802	1
13889	Everettia	paulbasintali	4.96555	118.174	1
13836	Everettia	paulbasintali	4.96958	118.177	1
13888	Everettia	paulbasintali	4.96958	118.177	3
5119	Everettia	subconsul	4.97091	117.807	4
13838	Everettia	paulbasintali	4.97317	118.174	1
13840	Everettia	paulbasintali	4.97317	118.174	1
13885	Everettia	paulbasintali	4.97317	118.174	4
13842	Everettia	paulbasintali	4.97529	118.19	1
13843	Everettia	paulbasintali	4.97529	118.19	1
13844	Everettia	paulbasintali	4.97529	118.19	1
13887	Everettia	paulbasintali	4.97529	118.19	13
13886	Everettia	paulbasintali	4.97958	118.207	6
13336	Everettia	paulbasintali	4.996	117.077	1
13334	Everettia	paulbasintali	4.99767	117.079	5
13320	Everettia	paulbasintali	5.00081	117.075	1
13315	Everettia	paulbasintali	5.00383	117.08	1
13330	Everettia	paulbasintali	5.00383	117.08	1
13322	Everettia	paulbasintali	5.0041	117.074	1
13335	Everettia	paulbasintali	5.0041	117.074	3
13326	Everettia	paulbasintali	5.00483	117.071	2
12820	Everettia	paulbasintali	5.1086	117.038	4
3370	Everettia	subconsul	5.10956	116.119	6
5264	Everettia	paulbasintali	5.11116	117.04	3
925	Everettia	subconsul	5.11116	117.04	2
927	Everettia	subconsul	5.11116	117.04	1
967	Everettia	subconsul	5.11116	117.04	3
5272	Everettia	subconsul	5.11116	117.04	2
1373	Everettia	subconsul	5.12156	115.945	3
4244	Everettia	occidentalis	5.12397	115.939	2
9246	Everettia	occidentalis	5.13994	116	1
9247	Everettia	occidentalis	5.13994	116	1
13812	Everettia	occidentalis	5.14	116	2
6421	Everettia	paulbasintali	5.21442	118.72	1
12821	Everettia	paulbasintali	5.21442	118.72	1
12817	Everettia	subconsul	5.21442	118.72	1
14090	Everettia	paulbasintali	5.21742	118.792	1
8637	Everettia	jucunda	5.22223	115.13	2
12142	Everettia	jucunda	5.22223	115.13	4
12146	Everettia	jucunda	5.22223	115.13	6
8633	Everettia	jucunda	5.22241	115.133	10
12141	Everettia	jucunda	5.22241	115.133	8
8627	Everettia	jucunda	5.22247	115.134	3
8628	Everettia	jucunda	5.22247	115.134	1
12122	Everettia	jucunda	5.22247	115.134	1
8654	Everettia	jucunda	5.22687	115.134	17
12104	Everettia	jucunda	5.22687	115.134	4
12135	Everettia	jucunda	5.22687	115.134	10
8645	Everettia	jucunda	5.22852	115.123	2
8648	Everettia	jucunda	5.22852	115.123	1
12113	Everettia	jucunda	5.22852	115.123	7
12119	Everettia	jucunda	5.22852	115.123	15
3112	Everettia	subconsul	5.26323	116.003	1
8591	Everettia	jucunda	5.2833	115.183	1
12457	Everettia	jucunda	5.28857	115.253	3
928	Everettia	paulbasintali	5.30082	118.734	5
7918	Everettia	jucunda	5.30722	115.199	2
7919	Everettia	jucunda	5.30722	115.199	1
7920	Everettia	jucunda	5.30722	115.199	1
12453	Everettia	jucunda	5.30722	115.199	9
926	Everettia	paulbasintali	5.31365	118.744	4
923	Everettia	paulbasintali	5.31365	118.744	2
924	Everettia	paulbasintali	5.31365	118.744	1
962	Everettia	paulbasintali	5.31365	118.744	17
964	Everettia	paulbasintali	5.31365	118.744	22
1146	Everettia	planispira	5.31365	118.744	1
5230	Everettia	subconsul	5.31365	118.744	1
5268	Everettia	subconsul	5.31365	118.744	1
12870	Everettia	jucunda	5.34361	115.53	3
8796	Everettia	jucunda	5.35148	115.208	1
6671	Everettia	jucunda	5.37254	115.234	8
12454	Everettia	jucunda	5.37282	115.234	5
12448	Everettia	jucunda	5.37669	115.231	1
12451	Everettia	jucunda	5.37754	115.232	7
6492	Everettia	subconsul	5.40033	116.103	1
9360	Everettia	subconsul	5.40033	116.103	1
13814	Everettia	subconsul	5.40113	116.102	1
6260	Everettia	subconsul	5.40262	116.104	2
6267	Everettia	subconsul	5.40262	116.104	5
6256	Everettia	subconsul	5.40262	116.101	2
6275	Everettia	subconsul	5.40262	116.104	1
6283	Everettia	subconsul	5.40262	116.101	1
13943	Everettia	jucundior	5.44583	117.526	1
13951	Everettia	subconsul	5.44583	117.526	2
13952	Everettia	subconsul	5.44583	117.526	1
5269	Everettia	jucundior	5.45031	118.144	1
2307	Everettia	subconsul	5.45031	118.144	18
2308	Everettia	subconsul	5.45031	118.144	13
2491	Everettia	subconsul	5.45031	118.144	7
1374	Everettia	subconsul	5.45066	116.045	1
1312	Everettia	monticola	5.45417	116.037	1
1378	Everettia	subconsul	5.45417	116.037	2
13969	Everettia	jucundior	5.45486	117.556	1
13970	Everettia	subconsul	5.45869	117.558	1
13972	Everettia	subconsul	5.45892	117.562	1
13964	Everettia	subconsul	5.46036	117.563	1
14092	Everettia	subconsul	5.46067	116.066	1
13960	Everettia	jucundior	5.4625	117.561	1
5499	Everettia	subconsul	5.46677	116.061	1
14031	Everettia	jucundior	5.47098	117.619	1
13953	Everettia	subconsul	5.47098	117.619	1
13955	Everettia	subconsul	5.47098	117.619	1
14033	Everettia	subconsul	5.47098	117.619	2
1424	Everettia	subconsul	5.48119	116.02	42
946	Everettia	occidentalis	5.4848	116.173	1
13815	Everettia	subconsul	5.4894	116.018	1
2311	Everettia	subconsul	5.517	118.303	3
2312	Everettia	subconsul	5.517	118.303	3
13935	Everettia	subconsul	5.517	118.303	2
14055	Everettia	jucundior	5.51842	118.302	1
1387	Everettia	subconsul	5.51842	118.302	6
1309	Everettia	planispira	5.51844	118.291	1
1295	Everettia	subconsul	5.51844	118.291	1
1294	Everettia	paulbasintali	5.52044	118.022	1
1296	Everettia	subconsul	5.52131	118.351	2
2304	Everettia	subconsul	5.52303	118.286	4
2305	Everettia	subconsul	5.52303	118.286	9
5955	Everettia	subconsul	5.52458	118.07	3
5270	Everettia	jucundior	5.52475	118.229	1
5267	Everettia	paulbasintali	5.52475	118.229	2
1291	Everettia	subconsul	5.52475	118.229	3
2084	Everettia	subconsul	5.52584	118.023	1
2309	Everettia	subconsul	5.52584	118.023	2
5792	Everettia	paulbasintali	5.52785	118.073	2
5758	Everettia	subconsul	5.5292	118.072	1
14059	Everettia	paulbasintali	5.5301	118.071	1
5717	Everettia	paulbasintali	5.5302	118.073	1
5714	Everettia	subconsul	5.5302	118.073	1
5703	Everettia	subconsul	5.5318	118.072	3
3597	Everettia	paulbasintali	5.53218	118.07	2
3646	Everettia	subconsul	5.53218	118.07	5
5683	Everettia	subconsul	5.533	118.067	1
1377	Everettia	subconsul	5.53319	118.312	5
1388	Everettia	subconsul	5.53319	118.312	1
6285	Everettia	subconsul	5.53639	118.213	1
2310	Everettia	paulbasintali	5.53644	118.213	2
2154	Everettia	planispira	5.53644	118.213	3
2306	Everettia	subconsul	5.54569	118.17	1
14111	Everettia	monticola	5.5692	116.494	2
11887	Everettia	planispira	5.604	118.339	4
1310	Everettia	monticola	5.64328	116.564	3
1293	Everettia	subconsul	5.64328	116.564	7
1386	Everettia	subconsul	5.64328	116.564	6
5262	Everettia	subconsul	5.65283	115.965	8
6287	Everettia	subconsul	5.65976	116.255	1
1380	Everettia	subconsul	5.67375	116.532	2
1384	Everettia	subconsul	5.67375	116.532	2
8443	Everettia	jucunda	5.71357	115.665	6
8520	Everettia	jucunda	5.71434	115.659	4
6566	Everettia	jucunda	5.71549	115.656	1
8514	Everettia	jucunda	5.71549	115.656	3
8441	Everettia	jucunda	5.71564	115.657	3
6569	Everettia	jucunda	5.71611	115.656	4
6609	Everettia	jucunda	5.71611	115.656	2
6611	Everettia	jucunda	5.72234	115.652	1
6601	Everettia	jucunda	5.724	115.648	4
6579	Everettia	jucunda	5.724	115.648	1
11095	Everettia	jucunda	5.72449	115.643	2
11105	Everettia	jucunda	5.72449	115.643	6
932	Everettia	jucunda	5.72524	115.654	16
11116	Everettia	jucunda	5.72575	115.644	3
4237	Everettia	jucunda	5.72592	115.651	1
4261	Everettia	jucunda	5.72592	115.651	2
6597	Everettia	jucunda	5.72749	115.653	9
6576	Everettia	jucunda	5.72749	115.653	6
8597	Everettia	jucunda	5.73065	115.651	1
11088	Everettia	jucunda	5.73065	115.651	18
11090	Everettia	jucunda	5.73065	115.651	3
12662	Everettia	layanglayang	5.77048	116.35	3
933	Everettia	subconsul	5.78465	116.342	4
2834	Everettia	subconsul	5.78465	116.342	1
14117	Everettia	planispira	5.79684	116.408	1
1292	Everettia	klemmantanica	5.79784	116.405	6
3608	Everettia	klemmantanica	5.79784	116.405
1306	Everettia	monticola	5.79784	116.405	6
1313	Everettia	monticola	5.79784	116.405	3
949	Everettia	subconsul	5.79784	116.405	3
12667	Everettia	monticola	5.79826	116.406	5
12660	Everettia	klemmantanica	5.79858	116.405	1
12666	Everettia	monticola	5.79957	116.404	2
3211	Everettia	planispira	5.80722	117.124	2
3212	Everettia	planispira	5.80722	117.124	3
3213	Everettia	planispira	5.80722	117.124	1
3214	Everettia	planispira	5.80722	117.124	2
3215	Everettia	planispira	5.80722	117.124	8
14048	Everettia	planispira	5.80722	117.124	3
14112	Everettia	planispira	5.80722	117.124	1
14113	Everettia	planispira	5.80722	117.124	1
3186	Everettia	subconsul	5.80722	117.124	4
3187	Everettia	subconsul	5.80722	117.124	1
3188	Everettia	subconsul	5.80722	117.124	2
3190	Everettia	subconsul	5.80722	117.124	1
3191	Everettia	subconsul	5.80722	117.124	1
3192	Everettia	subconsul	5.80722	117.124	2
5263	Everettia	subconsul	5.80722	117.124	6
5266	Everettia	subconsul	5.80722	117.124	3
14108	Everettia	subconsul	5.80722	117.124	3
12663	Everettia	subconsul	5.8195	116.342	1
5240	Everettia	subconsul	5.84831	116.123	1
12669	Everettia	subconsul	5.85487	116.14	2
13018	Everettia	subconsul	5.85654	116.138	1
968	Everettia	subconsul	5.8583	116.314	3
3362	Everettia	subconsul	5.88186	116.118	1
6617	Everettia	subconsul	5.9675	116.047	1
935	Everettia	subconsul	5.97184	116.214	9
972	Everettia	subconsul	5.97475	116.199	3
4813	Everettia	subconsul	5.97475	116.199	1
3479	Everettia	subconsul	5.97559	116.205	15
3454	Everettia	subconsul	5.97559	116.205	1
6477	Everettia	subconsul	5.97559	116.205	1
12868	Everettia	subconsul	5.97559	116.205	1
4246	Everettia	subconsul	6.00412	116.545	2
1314	Everettia	monticola	6.00433	116.546	2
1379	Everettia	subconsul	6.00433	116.546	1
973	Everettia	lapidini	6.00581	116.543	3
971	Everettia	subconsul	6.00581	116.543	5
4451	Everettia	subconsul	6.00664	116.545	10
4470	Everettia	subconsul	6.00666	116.54	1
920	Everettia	subconsul	6.00692	116.542	3
950	Everettia	subconsul	6.00692	116.542	3
4432	Everettia	subconsul	6.00798	116.546	1
5364	Everettia	monticola	6.00951	116.538	1
14063	Everettia	monticola	6.00951	116.538	2
4457	Everettia	subconsul	6.00951	116.538	2
6644	Everettia	subconsul	6.01163	116.022	1
6645	Everettia	subconsul	6.01163	116.022	1
6666	Everettia	subconsul	6.01163	116.022	8
951	Everettia	subconsul	6.01199	116.045	2
8479	Everettia	subconsul	6.01292	116.031	2
5374	Everettia	monticola	6.01345	116.535	1
12798	Everettia	monticola	6.01345	116.535	1
10366	Everettia	subconsul	6.0144	116.021	4
966	Everettia	subconsul	6.01501	116.044	3
6642	Everettia	subconsul	6.01705	116.02	1
6667	Everettia	subconsul	6.01705	116.02	4
9719	Everettia	subconsul	6.01718	116.032	3
11117	Everettia	subconsul	6.01718	116.032	3
5361	Everettia	monticola	6.01919	116.534	4
4448	Everettia	layanglayang	6.0198	116.538	5
5369	Everettia	monticola	6.0198	116.538	8
8510	Everettia	subconsul	6.02029	116.044	1
8511	Everettia	subconsul	6.02029	116.044	2
8852	Everettia	subconsul	6.02075	116.01	1
6488	Everettia	subconsul	6.02221	116.049	2
6677	Everettia	subconsul	6.02386	116.049	2
6679	Everettia	subconsul	6.02386	116.049	1
8499	Everettia	subconsul	6.02386	116.049	2
12789	Everettia	dominiki	6.02433	116.541	1
4467	Everettia	layanglayang	6.02433	116.541	1
5417	Everettia	monticola	6.02433	116.541	1
12794	Everettia	monticola	6.02433	116.541	1
14065	Everettia	monticola	6.02433	116.541	1
8521	Everettia	subconsul	6.0257	116.049	1
8491	Everettia	subconsul	6.02713	116.05	23
4452	Everettia	layanglayang	6.029	116.548	3
5376	Everettia	monticola	6.029	116.548	2
5265	Everettia	lapidini	6.02911	116.547	1
5394	Everettia	subconsul	6.03008	116.73	1
6311	Everettia	dominiki	6.03473	116.552	1
5419	Everettia	dominiki	6.03551	116.555	1
6331	Everettia	dominiki	6.03551	116.552	1
6328	Everettia	corrugata corrugata	6.03586	116.55	2
12809	Everettia	monticola	6.03643	116.547	1
4455	Everettia	layanglayang	6.03654	116.55	1
5405	Everettia	dominiki	6.03999	116.568	1
14075	Everettia	dominiki	6.03999	116.568	1
4463	Everettia	layanglayang	6.03999	116.568	1
4530	Everettia	layanglayang	6.03999	116.568	2
4468	Everettia	layanglayang	6.04022	116.567	1
4532	Everettia	layanglayang	6.04022	116.567	1
4429	Everettia	layanglayang	6.04047	116.573	1
5320	Everettia	lapidini	6.04052	116.574	1
4460	Everettia	layanglayang	6.04052	116.574	2
4462	Everettia	layanglayang	6.04052	116.574	1
4469	Everettia	layanglayang	6.04052	116.574	1
12785	Everettia	layanglayang	6.04052	116.574	1
5381	Everettia	dominiki	6.04078	116.57	1
4526	Everettia	layanglayang	6.04078	116.57	1
12920	Everettia	layanglayang	6.04078	116.57	1
14071	Everettia	safriei	6.04078	116.57	1
12783	Everettia	layanglayang	6.04086	116.572	1
5989	Everettia	subconsul	6.0412	116.117
5990	Everettia	subconsul	6.0412	116.117
14056	Everettia	dominiki	6.04123	116.616	2
4456	Everettia	layanglayang	6.04123	116.616	3
5358	Everettia	monticola	6.04123	116.616	1
5411	Everettia	monticola	6.04123	116.616	3
14086	Everettia	dominiki	6.04129	116.571	1
4471	Everettia	layanglayang	6.04129	116.571	1
4523	Everettia	layanglayang	6.04129	116.571	3
5385	Everettia	dominiki	6.04174	116.565	3
12795	Everettia	dominiki	6.04174	116.565	1
14083	Everettia	dominiki	6.04174	116.565	1
4472	Everettia	layanglayang	6.04174	116.565	1
5368	Everettia	monticola	6.04185	116.575	1
5388	Everettia	dominiki	6.04186	116.551	3
12784	Everettia	dominiki	6.04186	116.551	0
12786	Everettia	dominiki	6.04186	116.551	1
14080	Everettia	dominiki	6.04186	116.551	1
4430	Everettia	layanglayang	6.04186	116.551	2
4486	Everettia	layanglayang	6.04186	116.551	1
5413	Everettia	monticola	6.04221	116.576	2
5404	Everettia	dominiki	6.04249	116.616	9
4453	Everettia	layanglayang	6.04249	116.616	2
4591	Everettia	corrugata corrugata	6.04278	116.555	5
12815	Everettia	corrugata corrugata	6.04278	116.555	2
5390	Everettia	dominiki	6.04281	116.556	1
14079	Everettia	dominiki	6.04281	116.556	1
2697	Everettia	dominiki	6.04294	116.558	2
4437	Everettia	layanglayang	6.04296	116.592	1
2698	Everettia	dominiki	6.04318	116.558	1
2699	Everettia	layanglayang	6.04318	116.558	1
4449	Everettia	layanglayang	6.04329	116.588	3
12793	Everettia	layanglayang	6.04329	116.588	1
4441	Everettia	layanglayang	6.04343	116.589	3
14119	Everettia	layanglayang	6.04343	116.589	1
12944	Everettia	dominiki	6.04352	116.577	1
12918	Everettia	dominiki	6.04352	116.577	1
4510	Everettia	klemmantanica	6.04352	116.577	1
4436	Everettia	layanglayang	6.04352	116.577	1
5410	Everettia	monticola	6.04352	116.577	2
14116	Everettia	monticola	6.04352	116.577	1
4454	Everettia	layanglayang	6.04401	116.53	3
4447	Everettia	layanglayang	6.04407	116.616	2
5442	Everettia	corrugata corrugata	6.04416	116.56	3
5412	Everettia	dominiki	6.04421	116.594	2
5321	Everettia	lapidini	6.04421	116.594	1
4459	Everettia	layanglayang	6.04421	116.594	1
12805	Everettia	layanglayang	6.04421	116.594	1
5386	Everettia	dominiki	6.04432	116.586	5
12919	Everettia	dominiki	6.04432	116.586	1
4443	Everettia	layanglayang	6.04432	116.586	6
14081	Everettia	layanglayang	6.04432	116.586	1
5380	Everettia	dominiki	6.04443	116.579	3
12930	Everettia	dominiki	6.04443	116.579	1
5359	Everettia	monticola	6.04443	116.579	1
5378	Everettia	monticola	6.04443	116.579	2
14100	Everettia	monticola	6.04443	116.579	1
12943	Everettia	dominiki	6.0446	116.596	1
14082	Everettia	layanglayang	6.0446	116.596	1
5408	Everettia	monticola	6.0446	116.596	8
5396	Everettia	dominiki	6.04463	116.585	1
5500	Everettia	lapidini	6.04487	116.596	1
14062	Everettia	corrugata corrugata	6.0454	116.56	5
12955	Everettia	dominiki	6.0454	116.56	1
5391	Everettia	dominiki	6.04552	116.616	1
14058	Everettia	layanglayang	6.04552	116.562	1
5441	Everettia	corrugata corrugata	6.04554	116.56
14089	Everettia	dominiki	6.04572	116.56	1
12823	Everettia	subconsul	6.04593	116.703	1
2996	Everettia	corrugata corrugata	6.04623	116.561	4
5421	Everettia	dominiki	6.04668	116.616	1
4440	Everettia	layanglayang	6.04668	116.616	3
4534	Everettia	layanglayang	6.04668	116.616	1
5288	Everettia	corrugata corrugata	6.04741	116.56	2
12780	Everettia	corrugata corrugata	6.04741	116.56	1
12792	Everettia	corrugata corrugata	6.04741	116.56	1
14074	Everettia	dominiki	6.04741	116.56	1
12956	Everettia	dominiki	6.04743	116.598	1
4444	Everettia	layanglayang	6.04743	116.598	2
12957	Everettia	layanglayang	6.04743	116.598	2
14114	Everettia	monticola	6.04743	116.598	1
12950	Everettia	safriei	6.04743	116.598	1
14110	Everettia	planispira	6.04783	116.703	1
940	Everettia	subconsul	6.04783	116.703	2
4442	Everettia	layanglayang	6.04829	116.616	1
5383	Everettia	dominiki	6.04831	116.535	1
12861	Everettia	dominiki	6.04831	116.535	1
4450	Everettia	layanglayang	6.04831	116.535	2
5278	Everettia	corrugata corrugata	6.04846	116.563	2
5402	Everettia	dominiki	6.04846	116.563	3
12775	Everettia	dominiki	6.04846	116.563	1
4445	Everettia	layanglayang	6.04943	116.615	1
14084	Everettia	dominiki	6.04967	116.54	1
12851	Everettia	dominiki	6.04987	116.542	1
4485	Everettia	corrugata corrugata	6.04995	116.564	4
5281	Everettia	corrugata corrugata	6.04995	116.564	2
5415	Everettia	dominiki	6.0501	116.613	2
14085	Everettia	dominiki	6.0501	116.613	1
4433	Everettia	layanglayang	6.0501	116.613	3
12801	Everettia	layanglayang	6.0501	116.613	1
14076	Everettia	monticola	6.0501	116.613	1
6317	Everettia	corrugata corrugata	6.05028	116.552	2
6315	Everettia	dominiki	6.05028	116.552	1
12921	Everettia	dominiki	6.05053	116.613	2
4597	Everettia	layanglayang	6.05053	116.613	1
4431	Everettia	layanglayang	6.05102	116.612	2
12781	Everettia	corrugata corrugata	6.05132	116.564	1
12859	Everettia	dominiki	6.05176	116.545	1
5392	Everettia	dominiki	6.05201	116.547	1
14097	Everettia	lapidini	6.0531	116.612	1
12844	Everettia	dominiki	6.0534	116.549	1
12953	Everettia	layanglayang	6.0534	116.549	1
14067	Everettia	safriei	6.0534	116.549	1
4492	Everettia	corrugata corrugata	6.05435	116.566	4
5282	Everettia	corrugata corrugata	6.05435	116.566	4
12779	Everettia	corrugata corrugata	6.05435	116.566	1
12790	Everettia	corrugata corrugata	6.05435	116.566	1
5306	Everettia	safriei	6.05435	116.566	3
5276	Everettia	corrugata corrugata	6.0545	116.549	1
5285	Everettia	corrugata corrugata	6.0545	116.549	1
12945	Everettia	dominiki	6.0545	116.549	1
14070	Everettia	safriei	6.0545	116.549	2
4554	Everettia	corrugata corrugata	6.05523	116.555	1
5293	Everettia	corrugata corrugata	6.05523	116.555	2
5400	Everettia	dominiki	6.05523	116.555	2
12857	Everettia	dominiki	6.05523	116.555	1
4557	Everettia	corrugata corrugata	6.05628	116.55	1
12845	Everettia	safriei	6.05628	116.55	1
12933	Everettia	safriei	6.05628	116.55	1
14073	Everettia	safriei	6.05628	116.55	1
4501	Everettia	corrugata corrugata	6.05636	116.566	12
5289	Everettia	corrugata corrugata	6.05636	116.566	4
12835	Everettia	corrugata corrugata	6.05636	116.566	1
12836	Everettia	corrugata corrugata	6.05636	116.566	1
12843	Everettia	corrugata corrugata	6.05636	116.566	1
5399	Everettia	dominiki	6.05636	116.566	2
12782	Everettia	corrugata corrugata	6.05638	116.564	1
2688	Everettia	corrugata corrugata	6.05643	116.566	6
2874	Everettia	corrugata corrugata	6.05643	116.566	2
5439	Everettia	corrugata corrugata	6.05643	116.566	1
5440	Everettia	corrugata corrugata	6.05643	116.566	6
2691	Everettia	dominiki	6.05643	116.566	1
14047	Everettia	dominiki	6.05643	116.566	2
4550	Everettia	corrugata corrugata	6.05659	116.562	2
5279	Everettia	corrugata corrugata	6.05659	116.562	6
12910	Everettia	corrugata corrugata	6.05659	116.562	1
12860	Everettia	dominiki	6.05659	116.562	1
4545	Everettia	corrugata corrugata	6.05667	116.557	4
5286	Everettia	corrugata corrugata	6.05667	116.557	2
12909	Everettia	corrugata corrugata	6.05667	116.557	2
5401	Everettia	dominiki	6.05667	116.557	4
12940	Everettia	dominiki	6.05667	116.557	1
12928	Everettia	dominiki	6.05667	116.557	1
12913	Everettia	jasilini	6.05667	116.557	1
5302	Everettia	safriei	6.05667	116.557	3
5287	Everettia	corrugata corrugata	6.0572	116.56	4
5403	Everettia	dominiki	6.0572	116.56	1
4438	Everettia	layanglayang	6.05738	116.61	1
4473	Everettia	layanglayang	6.05738	116.61	1
5300	Everettia	corrugata williamsi	6.05746	116.613	1
4458	Everettia	layanglayang	6.05746	116.613	2
4537	Everettia	layanglayang	6.05746	116.613	1
12903	Everettia	layanglayang	6.05746	116.613	1
5307	Everettia	safriei	6.05746	116.613	1
14049	Everettia	safriei	6.05746	116.613	10
4439	Everettia	layanglayang	6.05788	116.612	1
4538	Everettia	layanglayang	6.05788	116.612	1
14040	Everettia	layanglayang	6.05788	116.612	1
14078	Everettia	monticola	6.05788	116.612	1
12952	Everettia	safriei	6.05788	116.612	1
4499	Everettia	corrugata corrugata	6.0582	116.566	2
5284	Everettia	corrugata corrugata	6.0582	116.566	3
5294	Everettia	corrugata corrugata	6.0582	116.566	2
4435	Everettia	layanglayang	6.0582	116.566	1
14087	Everettia	dominiki	6.05832	116.609	1
941	Everettia	corrugata corrugata	6.05839	116.566	1
5438	Everettia	corrugata corrugata	6.05839	116.566	25
4461	Everettia	layanglayang	6.05957	116.608	1
4505	Everettia	corrugata corrugata	6.06036	116.567	5
5275	Everettia	corrugata corrugata	6.06036	116.567	2
12839	Everettia	corrugata corrugata	6.06036	116.567	1
12840	Everettia	corrugata corrugata	6.06036	116.567	1
12841	Everettia	corrugata corrugata	6.06036	116.567	1
12842	Everettia	corrugata corrugata	6.06036	116.567	1
5296	Everettia	corrugata williamsi	6.06079	116.608	1
5389	Everettia	dominiki	6.06079	116.608	4
2672	Everettia	corrugata corrugata	6.0608	116.567	1
2676	Everettia	corrugata corrugata	6.0608	116.567	6
2679	Everettia	corrugata corrugata	6.0608	116.567	8
2866	Everettia	corrugata corrugata	6.0608	116.567	15
2869	Everettia	corrugata corrugata	6.0608	116.567	30
2671	Everettia	safriei	6.0608	116.567	1
14105	Everettia	safriei	6.0608	116.567	1
4504	Everettia	corrugata corrugata	6.06104	116.567	8
5283	Everettia	corrugata corrugata	6.06104	116.567	1
12827	Everettia	corrugata corrugata	6.06104	116.567	1
12848	Everettia	corrugata corrugata	6.06104	116.567	1
12849	Everettia	corrugata corrugata	6.06104	116.567	1
12850	Everettia	corrugata corrugata	6.06104	116.567	1
4503	Everettia	corrugata corrugata	6.06157	116.567	2
5290	Everettia	corrugata corrugata	6.06157	116.567	1
12825	Everettia	corrugata corrugata	6.06157	116.567	1
12826	Everettia	corrugata corrugata	6.06157	116.567	1
4506	Everettia	corrugata corrugata	6.06263	116.568	7
12847	Everettia	corrugata corrugata	6.06263	116.568	1
12853	Everettia	corrugata corrugata	6.06263	116.568	1
5295	Everettia	corrugata williamsi	6.06302	116.608	1
5387	Everettia	dominiki	6.06302	116.608	1
12788	Everettia	dominiki	6.06302	116.608	1
4502	Everettia	corrugata corrugata	6.06324	116.568	6
12828	Everettia	corrugata corrugata	6.06324	116.568	1
12832	Everettia	corrugata corrugata	6.06324	116.568	1
12833	Everettia	corrugata corrugata	6.06324	116.568	1
12834	Everettia	corrugata corrugata	6.06324	116.568	1
5309	Everettia	safriei	6.06443	116.606	2
12855	Everettia	safriei	6.06443	116.606	1
4596	Everettia	corrugata williamsi	6.06483	116.606	1
5298	Everettia	corrugata williamsi	6.06627	116.605	2
5418	Everettia	dominiki	6.06627	116.605
14088	Everettia	monticola	6.06627	116.605	1
12948	Everettia	safriei	6.06627	116.605	1
4543	Everettia	corrugata williamsi	6.0679	116.604	1
5299	Everettia	corrugata williamsi	6.0679	116.604	1
5420	Everettia	dominiki	6.0679	116.604	4
12838	Everettia	dominiki	6.0679	116.604	1
5297	Everettia	corrugata williamsi	6.0681	116.602	1
14042	Everettia	corrugata williamsi	6.0681	116.602	4
5416	Everettia	dominiki	6.0681	116.602	1
12935	Everettia	safriei	6.0681	116.602	1
5303	Everettia	safriei	6.07068	116.601	4
12856	Everettia	safriei	6.07068	116.601	1
12926	Everettia	safriei	6.07068	116.601	1
14066	Everettia	safriei	6.07068	116.601	1
13983	Everettia	subconsul	6.07077	116.515	2
11973	Everettia	subconsul	6.07139	116.074	1
5304	Everettia	safriei	6.07663	116.601	6
12830	Everettia	safriei	6.07663	116.601	1
14064	Everettia	safriei	6.07663	116.601	1
5311	Everettia	jasilini	6.07682	116.599	2
5308	Everettia	safriei	6.07682	116.599	7
12939	Everettia	safriei	6.07682	116.599	1
14068	Everettia	safriei	6.07682	116.599	1
13991	Everettia	dominiki	6.07938	116.514	2
5315	Everettia	jasilini	6.08068	116.589	3
5317	Everettia	jasilini	6.08068	116.6	2
12829	Everettia	jasilini	6.08068	116.589	1
12846	Everettia	jasilini	6.08068	116.6	1
14069	Everettia	jasilini	6.08068	116.6	1
5314	Everettia	jasilini	6.08074	116.587	2
5310	Everettia	safriei	6.08146	116.596	1
12929	Everettia	safriei	6.08146	116.596	1
14072	Everettia	safriei	6.08146	116.596	1
13981	Everettia	dominiki	6.08176	116.523	1
5305	Everettia	safriei	6.08257	116.593	3
4589	Everettia	corrugata corrugata	6.12061	116.579	1
5292	Everettia	corrugata corrugata	6.12061	116.579	1
5277	Everettia	corrugata corrugata	6.12147	116.578	1
14133	Everettia	corrugata williamsi	6.12147	116.578	2
5318	Everettia	jasilini	6.12147	116.578	1
12938	Everettia	jasilini	6.12147	116.578	1
12949	Everettia	jasilini	6.12147	116.578	1
12954	Everettia	jasilini	6.12147	116.578	1
12946	Everettia	jasilini	6.12147	116.578	1
14044	Everettia	jasilini	6.12147	116.578	3
12942	Everettia	dominiki	6.12169	116.576	1
5316	Everettia	jasilini	6.12169	116.576	2
14126	Everettia	jasilini	6.12169	116.576	2
4588	Everettia	jasilini	6.12179	116.577	2
5313	Everettia	jasilini	6.12179	116.577	1
5319	Everettia	jasilini	6.12179	116.577	3
12810	Everettia	jasilini	6.12179	116.577	1
4583	Everettia	corrugata corrugata	6.12353	116.574	1
5280	Everettia	corrugata corrugata	6.12353	116.574	2
5398	Everettia	dominiki	6.12353	116.574	5
12799	Everettia	dominiki	6.12353	116.574	1
12806	Everettia	dominiki	6.12353	116.574	1
5291	Everettia	corrugata corrugata	6.12578	116.573	1
5422	Everettia	dominiki	6.12578	116.573	1
5414	Everettia	dominiki	6.12713	116.573	2
5370	Everettia	monticola	6.12713	116.573	1
14102	Everettia	dominiki	6.13537	116.57	1
4579	Everettia	layanglayang	6.13537	116.57	1
5409	Everettia	dominiki	6.13717	116.567	3
12907	Everettia	dominiki	6.13717	116.567	1
5365	Everettia	dominiki	6.13897	116.567	1
4446	Everettia	subconsul	6.13897	116.567	2
4578	Everettia	subconsul	6.13897	116.567	1
5377	Everettia	monticola	6.14257	116.568	4
4423	Everettia	subconsul	6.14257	116.568	2
4577	Everettia	subconsul	6.14257	116.568	1
12912	Everettia	subconsul	6.14257	116.568	1
5366	Everettia	monticola	6.15112	116.571	5
5371	Everettia	monticola	6.15112	116.571	1
4421	Everettia	subconsul	6.15112	116.571	1
1385	Everettia	subconsul	6.15906	116.569	4
14106	Everettia	subconsul	6.15906	116.569	1
4434	Everettia	subconsul	6.16297	116.567	3
6167	Everettia	subconsul	6.19059	115.596	11
6158	Everettia	subconsul	6.19087	115.594	38
12327	Everettia	subconsul	6.19802	115.607	7
5395	Everettia	dominiki	6.2024	116.66	3
5407	Everettia	dominiki	6.20326	116.663	1
5382	Everettia	dominiki	6.20481	116.666	2
5384	Everettia	dominiki	6.20481	116.671	5
12917	Everettia	dominiki	6.20481	116.671	1
12800	Everettia	dominiki	6.20493	116.667	1
12916	Everettia	dominiki	6.20493	116.667	1
14118	Everettia	dominiki	6.20493	116.667	1
5406	Everettia	dominiki	6.20629	116.673	1
12791	Everettia	dominiki	6.20629	116.673	1
14077	Everettia	dominiki	6.20629	116.673	1
5373	Everettia	monticola	6.20756	116.674	1
5372	Everettia	monticola	6.20884	116.699	2
12852	Everettia	planispira	6.20884	116.699	1
4425	Everettia	subconsul	6.20884	116.699	2
5397	Everettia	dominiki	6.20987	116.68	1
5375	Everettia	monticola	6.20987	116.68	1
4412	Everettia	subconsul	6.20987	116.68	1
14107	Everettia	subconsul	6.20987	116.68	1
4416	Everettia	subconsul	6.2102	116.701	1
12813	Everettia	subconsul	6.2102	116.701	2
4428	Everettia	subconsul	6.21273	116.723	1
4409	Everettia	subconsul	6.21437	116.712	6
5360	Everettia	monticola	6.25982	116.682	1
14054	Everettia	monticola	6.25982	116.682	1
14099	Everettia	monticola	6.25982	116.682	1
5363	Everettia	monticola	6.26319	116.678	2
4417	Everettia	subconsul	6.26319	116.678	11
14046	Everettia	monticola	6.26561	116.682	1
14057	Everettia	monticola	6.26561	116.682	2
4414	Everettia	subconsul	6.26561	116.682	1
5379	Everettia	monticola	6.26564	116.683	3
4426	Everettia	subconsul	6.26564	116.683	1
14104	Everettia	monticola	6.26567	116.684	1
4415	Everettia	subconsul	6.26567	116.684	2
5362	Everettia	monticola	6.2657	116.685	8
4410	Everettia	subconsul	6.2657	116.685	2
4574	Everettia	subconsul	6.2657	116.685	1
4418	Everettia	subconsul	6.26663	116.686	2
4424	Everettia	subconsul	6.26763	116.687	13
4420	Everettia	subconsul	6.27269	116.688	8
4419	Everettia	subconsul	6.2732	116.689	1
4422	Everettia	subconsul	6.27379	116.69	3
5367	Everettia	planispira	6.27721	116.692	1
4572	Everettia	subconsul	6.27721	116.692	1
4411	Everettia	subconsul	6.28068	116.693	4
4413	Everettia	subconsul	6.28068	116.693	2
3114	Everettia	subconsul	6.28917	116.713	4
8926	Everettia	subconsul	6.40861	116.797	1
4369	Everettia	subconsul	6.55039	116.868	1
4375	Everettia	subconsul	6.56446	116.661	4
13936	Everettia	subconsul	6.56446	116.661	1
3009	Everettia	bangueyensis	7.13171	117.074	3
13186	Everettia	planispira	7.14869	117.099	2
13140	Everettia	bangueyensis	7.17838	117.041	1
13207	Everettia	planispira	7.17838	117.041	1
13189	Everettia	bangueyensis	7.21883	116.883	1
3686	Everettia	bangueyensis	7.24234	116.882	16
13055	Everettia	bangueyensis	7.29042	117.091	1
13056	Everettia	bangueyensis	7.29042	117.091	1
13057	Everettia	bangueyensis	7.29042	117.091	1
13203	Everettia	bangueyensis	7.29265	117.089	1
